# Supplementary material
Source: HighWire-hosted journal article supplement (https://www.annals.org/content/suppl/2006/04/12/144.8.581)
Supplement: Smetana_AT1_144-8-581-DC1-1.pdf [file Smetana_AT1_144-8-581-DC1-1.pdf]

**Appendix Table 1. Study Characteristics of Univariate Studies of Clinical Risk Factors\***

| Author, Year (Reference)         | Study Type†            | Timeline      | Type of Surgery                         | Specific PPCs Studied                                                                                                    | Inclusion Criteria                                                                                      |
|----------------------------------|------------------------|---------------|-----------------------------------------|--------------------------------------------------------------------------------------------------------------------------|---------------------------------------------------------------------------------------------------------|
| Fasth et al., 1980 (19)          | Cohort                 | Prospective   | Bowel resection for Crohn disease       | Pneumonia                                                                                                                |                                                                                                         |
| Warren and Grimwood, 1980 (20)   | Cohort                 | Retrospective | Open cholecystectomy                    | Atelectasis, pneumonia                                                                                                   |                                                                                                         |
| Wirén and Janzon, 1983 (21)      | Cohort                 | Retrospective | Gall bladder or peptic ulcer surgery    | Pneumonia or atelectasis                                                                                                 | Elective                                                                                                |
| Seymour and Pringle, 1983 (22)   | Cohort                 | Prospective   | General surgery                         | Pneumonia                                                                                                                | Age > 65 y                                                                                              |
| Diehl et al., 1983 (23)          | Cohort                 | Retrospective | AAA repair                              | Pneumonia, respiratory failure                                                                                           |                                                                                                         |
| Buckwalter and Herbst, 1983 (24) | Cohort                 | Prospective   | Gastric bypass                          | All that prolonged hospitalization or required treatment                                                                 |                                                                                                         |
| Galicier and Richet, 1985 (25)   | Cohort                 | Prospective   | All                                     | Pneumonia                                                                                                                |                                                                                                         |
| Beard et al., 1986 (26)          | Cohort                 | Prospective   | All                                     | Respiratory depression, bronchospasm, cyanosis, respiratory congestion, dyspnea, pneumothorax, atelectasis, laryngospasm |                                                                                                         |
| Matsumata et al., 1987 (27)      | Case series 25–99      | Retrospective | Hepatic resection                       | Pleural effusion                                                                                                         |                                                                                                         |
| Fogh et al., 1987 (28)           | Cohort                 | Prospective   | Major abdominal                         | Pneumonia, atelectasis, respiratory failure                                                                              |                                                                                                         |
| Zelcher and Wells, 1987 (29)     | Cohort                 | Prospective   | All                                     | Cyanosis, bronchospasm, laryngospasm, aspiration, reintubation, hypoventilation                                          |                                                                                                         |
| Fasth et al., 1987 (30)          | RCT                    | Prospective   | Colorectal surgery                      | Pneumonia                                                                                                                |                                                                                                         |
| Hollier et al., 1988 (31)        | Cohort                 | Retrospective | Thoracoabdominal aortic aneurysm repair | Respiratory failure                                                                                                      |                                                                                                         |
| Poe et al., 1988 (32)            | Cohort                 | Prospective   | Elective cholecystectomy                | Atelectasis, pneumonia, purulent bronchitis                                                                              |                                                                                                         |
| Jørgensen et al., 1988 (33)      | Cohort                 | Retrospective | Abdominal                               | Pneumonia                                                                                                                | All patients had fever                                                                                  |
| Roberts et al., 1988 (34)        | Cohort                 | Prospective   | Elective abdominal                      | Atelectasis                                                                                                              |                                                                                                         |
| Tartter, 1988 (35)               | Cohort                 | Retrospective | Colorectal cancer                       | Pneumonia                                                                                                                |                                                                                                         |
| Mellors et al., 1988 (36)        | Cohort                 | Prospective   | Abdominal                               | Pneumonia                                                                                                                |                                                                                                         |
| Pien et al., 1988 (37)           | Cohort with comparison | Retrospective | All                                     | Asthma exacerbation, pneumonia                                                                                           | Asthma prompting preoperative medical consultation, use of inhaled steroids or alternate-day prednisone |
| Nielsen et al., 1989 (38)        | Cohort                 | Prospective   | Upper abdominal                         | Pleural effusion, atelectasis                                                                                            | Elective upper abdominal surgery                                                                        |
| Ejlertsen et al., 1989 (39)      | Cohort                 | Retrospective | Elective upper abdominal                | Pneumonia                                                                                                                |                                                                                                         |
| Vodinh et al., 1989 (40)         | Cohort                 | Prospective   | Vascular                                | Pneumonia, atelectasis, pleural effusion, respiratory failure                                                            |                                                                                                         |
| Seymour and Vaz, 1989 (41)       | Cohort                 | Prospective   | Noncardiac                              | Pneumonia, atelectasis                                                                                                   | Age > 65 y                                                                                              |

*Appendix Table 1—Continued*

| Exclusion Criteria                                                                                                 | Other Footnotes                                            | Hierarchy of Research Design‡ | Study Quality | Considered All Key Confounders: Type of Surgery, Age, COPD | Patients, n | PPCs, n | Mean Age, y | Men, % |
|--------------------------------------------------------------------------------------------------------------------|------------------------------------------------------------|-------------------------------|---------------|------------------------------------------------------------|-------------|---------|-------------|--------|
| None                                                                                                               |                                                            | II-3                          | Fair          | No                                                         | 153         | 2       |             |        |
| None                                                                                                               |                                                            | II-3                          | Poor          | No                                                         | 194         | 42      | 52          | 70     |
| None                                                                                                               |                                                            | II-3                          | Poor          | No                                                         | 52          | 28      | 53          | 100    |
| None                                                                                                               |                                                            | II-3                          | Poor          | No                                                         | 258         | 102     | NA          | 57     |
| None                                                                                                               |                                                            | II-3                          | Poor          | No                                                         | 557         | 33      | 63          | 81     |
| None                                                                                                               |                                                            | II-3                          | Poor          | No                                                         | 565         | 3       | 40          | 36     |
| ACS class IV (dirty) procedures                                                                                    |                                                            | II-3                          | Poor          | No                                                         | 693         | 23      | NA          | NA     |
| None                                                                                                               | Studied only immediate postoperative complications in PACU | II-2                          | Poor          | No                                                         | 2293        | 44      | NA          | NA     |
| Postoperative subphrenic abscess, thoracoabdominal incision                                                        |                                                            | II-3                          | Poor          | No                                                         | 80          | 40      | 56          | 74     |
| None                                                                                                               |                                                            | II-3                          | Poor          | No                                                         | 125         | 23      | NA          | NA     |
| None                                                                                                               | Studied only immediate postoperative complications in PACU | II-2                          | Poor          | No                                                         | 443         | 10      | NA          | NA     |
| None                                                                                                               |                                                            | II-3                          | Poor          | No                                                         | 92          | 5       | NA          | NA     |
| None                                                                                                               |                                                            | II-3                          | Poor          | No                                                         | 101         | 33      | 69          | 60     |
| None                                                                                                               |                                                            | II-2                          | Fair          | No                                                         | 209         | 31      |             | 26     |
| Surgery < 1 h duration                                                                                             |                                                            | II-3                          | Fair          | No                                                         | 259         | 47      | NA          | NA     |
| None                                                                                                               |                                                            | II-3                          | Good          | No                                                         | 270         | 154     |             |        |
| Liver or other metastatic lesions                                                                                  |                                                            | II-2                          | Fair          | No                                                         | 343         | 6       | 69          | 50     |
| Gynecologic surgery, age < 16 y                                                                                    |                                                            | II-2                          | Fair          | No                                                         | 434         | 4       |             |        |
| None                                                                                                               |                                                            | II-2                          | Poor          | No                                                         | 4121        | 36      | 51          | 32     |
| Medical treatment for heart or lung disease, elevated serum creatinine level, CHF on preoperative chest radiograph |                                                            | II-2                          | Poor          | No                                                         | 128         | 89      | 59          | 37     |
| Preoperative pulmonary, cardiovascular, renal, or hepatic disease                                                  |                                                            | II-2                          | Poor          | No                                                         | 130         | 11      | 53.1        | NA     |
| Life-threatening emergency surgery, carotid surgery, varicose vein surgery                                         |                                                            | II-2                          | Poor          | No                                                         | 151         | 56      | 61          | 85     |
| None                                                                                                               |                                                            | II-3                          | Poor          | No                                                         | 288         | 40      | NA          | NA     |

**Appendix Table 1—Continued**

| Author, Year (Reference)   | Study Type†       | Timeline      | Type of Surgery                           | Specific PPCs Studied                                     | Inclusion Criteria                                                                                                     |
|----------------------------|-------------------|---------------|-------------------------------------------|-----------------------------------------------------------|------------------------------------------------------------------------------------------------------------------------|
| Koness et al., 1990 (42)   | Cohort            | Retrospective | Perforated peptic ulcer                   | Respiratory failure                                       |                                                                                                                        |
| Patrick et al., 1990 (43)  | Cohort            | Retrospective | All                                       | Pneumonia, respiratory failure                            | Neuromuscular restrictive pulmonary physiology requiring continuous or intermittent mechanical ventilation at baseline |
| Verdeil et al., 1990 (44)  | Cohort            | Prospective   | Vascular                                  | Pneumonia                                                 |                                                                                                                        |
| Arriaga et al., 1990 (45)  | Cohort            | Retrospective | Laryngectomy                              | Respiratory failure                                       |                                                                                                                        |
| Pinto et al., 1991 (46)    | Cohort            | Retrospective | Gastric cancer                            | Pneumonia                                                 |                                                                                                                        |
| Hall et al., 1991 (47)     | Cohort            | Prospective   | Abdominal                                 | Atelectasis, pneumonia                                    | Manipulation of abdominal viscera                                                                                      |
| Greco et al., 1991 (48)    | Cohort            | Prospective   | All                                       | Pneumonia                                                 | Any surgery                                                                                                            |
| Katz et al., 1992 (49)     | Case series 25–99 | Prospective   | Aortic                                    | Pneumonia, respiratory failure                            | Elective aortic reconstruction                                                                                         |
| Kroenke et al., 1992 (50)  | Cohort            | Retrospective | All                                       | All                                                       | Severe COPD with FEV <sub>1</sub> < 50%, predicted and FEV <sub>1</sub> :FVC < 70%                                     |
| Dilworth et al., 1991 (51) | Cohort            | Prospective   | Upper abdominal                           | Pneumonia                                                 |                                                                                                                        |
| Kispert et al., 1992 (52)  | Cohort            | Retrospective | Major vascular                            | Pneumonia, respiratory failure, ARDS                      | Elective                                                                                                               |
| Brooks-Brunn, 1992 (53)    | Cohort            | Retrospective | Open cholecystectomy                      | Pneumonia, atelectasis                                    |                                                                                                                        |
| Braga et al., 1992 (54)    | Cohort            | Retrospective | Gastric, colorectal, or pancreatic cancer | Pneumonia                                                 |                                                                                                                        |
| Evaldson et al., 1992 (55) | Cohort            | Prospective   | Obstetric and gynecologic                 | Pneumonia                                                 | Obstetric and gynecologic                                                                                              |
| Iwamoto et al., 1993 (56)  | Case series       | Retrospective | Thoracic, abdominal, or neurosurgery      | Pneumonia                                                 |                                                                                                                        |
| Jayr et al., 1993 (57)     | Cohort            | Prospective   | Intraabdominal vascular                   | Respiratory failure                                       | Midline incision                                                                                                       |
| Kroenke et al., 1993 (58)  | Cohort            | Retrospective | Major abdominal and nonresective thoracic | Atelectasis, bronchospasm, pneumonia, respiratory failure | Severe COPD with FEV <sub>1</sub> < 50%, predicted and FEV <sub>1</sub> :FVC, < 70%                                    |

Appendix Table 1—Continued

| Exclusion Criteria                                                                                   | Other Footnotes                                                                                                                                                     | Hierarchy of Research Design‡ | Study Quality | Considered All Key Confounders: Type of Surgery, Age, COPD | Patients, n | PPCs, n | Mean Age, y | Men, % |
|------------------------------------------------------------------------------------------------------|---------------------------------------------------------------------------------------------------------------------------------------------------------------------|-------------------------------|---------------|------------------------------------------------------------|-------------|---------|-------------|--------|
| None                                                                                                 | Can't assess effect of risk factors because analysis only evaluated effect of risk factors on mortality                                                             | II-3                          | Poor          | No                                                         | 109         | 16      | 67          | 55     |
| None                                                                                                 |                                                                                                                                                                     | II-3                          | Poor          | No                                                         | 142         | 17      | NA          | NA     |
| None                                                                                                 |                                                                                                                                                                     | II-3                          | Poor          | No                                                         | 329         | 5       | NA          | NA     |
| None                                                                                                 |                                                                                                                                                                     | II-3                          | Poor          | No                                                         | 414         | 74      | 62          | NA     |
| Hospital stay < 7 d                                                                                  | Can't assess effect of risk factors because all infectious complications were combined                                                                              | II-3                          | Fair          | No                                                         | 196         | 18      | 67          | 60     |
| Hernia repair, declined consent, ICU care immediately after surgery                                  |                                                                                                                                                                     | II-2                          | Fair          | No                                                         | 1000        | 232     | 54          | 53     |
| Inadequate data collection                                                                           | Included only preintervention patients                                                                                                                              | II-3                          | Poor          | No                                                         | 4096        | 119     | 47          |        |
| None                                                                                                 |                                                                                                                                                                     | II-3                          | Poor          | No                                                         | 64          | 24      | 67          | 44     |
| None                                                                                                 |                                                                                                                                                                     | II-2                          | Fair          | Yes                                                        | 107         | 34      | 66          | 72     |
| None                                                                                                 |                                                                                                                                                                     | II-2                          | Poor          | No                                                         | 127         | 26      | 56          | 39     |
| None                                                                                                 |                                                                                                                                                                     | II-2                          | Poor          | No                                                         | 147         | 19      | 65          | 77     |
| Age < 12 y, surgeries other than cholecystectomy at same time, preoperative pneumonia or atelectasis | Did not abstract risk factor data because author chose to include only a sampling (54 of 209) of patients with no PPC for risk factor analysis                      | II-2                          | Poor          | No                                                         | 263         | 54      | NA          | NA     |
| Age > 80 y, antibiotic use in previous 2 d, emergency surgery, palliative surgery                    |                                                                                                                                                                     | II-2                          | Fair          | No                                                         | 285         | 8       | 59          | 46     |
| Dilation and curettage, abortion, noncesarean obstetric procedures                                   | Can't assess effect of risk factors because all infectious complications were combined                                                                              | II-3                          | Poor          | No                                                         | 2361        | 8       | NA          | 0      |
| Age < 20 y                                                                                           | PPC was postoperative pneumonia identified by discharge diagnoses only                                                                                              | II-3                          | Poor          | No                                                         | 4380        | 30      |             |        |
| None                                                                                                 |                                                                                                                                                                     | II-2                          | Poor          | No                                                         | 51          | 12      |             | 65     |
| None                                                                                                 | Excluded risk factor analysis that looked at risk for severe PPC or death; subcategorized COPD into severe (PPC rate: 17/26) and mild or moderate (PPC rate: 27/52) | II-2                          | Good          | Yes                                                        | 130         | 64      | 63          | 68     |

**Appendix Table 1—Continued**

| Author, Year (Reference)            | Study Type†            | Timeline      | Type of Surgery                              | Specific PPCs Studied                                                                                                                     | Inclusion Criteria                                                                            |
|-------------------------------------|------------------------|---------------|----------------------------------------------|-------------------------------------------------------------------------------------------------------------------------------------------|-----------------------------------------------------------------------------------------------|
| Ephgrave et al., 1993 (59)          | Cohort                 | Prospective   | Any requiring postoperative nasogastric tube | Pneumonia                                                                                                                                 | Postoperative nasogastric tube, male veterans                                                 |
| Calligaro et al., 1993 (60)         | Cohort                 | Retrospective | AAA repair                                   | Pneumonia, respiratory failure                                                                                                            | AAA repair                                                                                    |
| Heiss et al., 1993 (61)             | RCT                    | Prospective   | Colorectal cancer                            | Pneumonia                                                                                                                                 | Hemoglobin level > 125 g/L                                                                    |
| Weber et al., 1993 (62)             | RCT                    | Prospective   | Head and neck oncologic surgery              | Pneumonia, bronchitis                                                                                                                     |                                                                                               |
| Money et al., 1994 (63)             | Cohort                 | Retrospective | Thoracoabdominal aortic aneurysm repair      | Respiratory failure                                                                                                                       |                                                                                               |
| Charash et al., 1994 (64)           | Cohort                 | Retrospective | Femur fracture repair                        | Pulmonary contusion, pneumonia, fat embolism, pulmonary embolism                                                                          | Blunt midshaft femur fracture stabilized with intramedullary nail, injury severity score > 17 |
| Gefke et al., 1994 (65)             | Cohort                 | Retrospective | Abdominal aortic                             | Respiratory failure                                                                                                                       |                                                                                               |
| Arvidsson et al., 1994 (66)         | Cohort                 | Prospective   | Elective                                     | Respiratory arrest, aspiration, respiratory distress, pneumonia, pleuritis, hydrothorax, pneumothorax, atelectasis, asthmatic obstruction | Adults, surgery requiring incision, anticipated hospital stay at least 24 h                   |
| Lawrence et al., 1995 (67)          | Case-control           | Retrospective | Abdominal                                    | Pneumonia, respiratory failure, bronchospasm, bronchitis, pleural effusion                                                                |                                                                                               |
| Kabalin et al., 1995 (68)           | Case series 25–99      | Retrospective | All                                          | Asthma exacerbation                                                                                                                       | Asthma prompting preoperative medical consultation                                            |
| Gilling-Smith et al., 1995 (69)     | Cohort                 | Retrospective | Thoracoabdominal aortic aneurysm repair      | Pneumonia, respiratory failure                                                                                                            |                                                                                               |
| Liedman et al., 1995 (70)           | Cohort                 | Retrospective | Esophageal or gastric cancer                 | Pneumonia, respiratory failure                                                                                                            |                                                                                               |
| Choban et al., 1995 (71)            | Cohort with comparison | Retrospective | General, urologic, gynecologic, or thoracic  | Pneumonia                                                                                                                                 |                                                                                               |
| Hall et al., 1996 (72)              | Case-control           | Retrospective | Open cholecystectomy                         | Lung collapse or consolidation                                                                                                            | ASA class I–II, general anesthesia                                                            |
| Kocabas et al., 1996 (73)           | Cohort                 | Prospective   | Elective upper abdominal                     | Pneumonia, bronchitis, atelectasis, pulmonary embolism                                                                                    |                                                                                               |
| Warner et al., 1996 (74)            | Cohort                 | Retrospective | All                                          | Bronchospasm, laryngospasm                                                                                                                | General anesthesia or neuraxial blockade                                                      |
| Wolters et al., 1996 (75)           | Cohort                 | Prospective   | General or vascular                          | Pneumonia, atelectasis, pleural effusion                                                                                                  |                                                                                               |
| Rose et al., 1996 (76)              | Cohort                 | Prospective   | Inpatient                                    | Unplanned mechanical ventilation                                                                                                          |                                                                                               |
| Ferguson et al., 1997 (77)          | Cohort                 | Retrospective | Esophagectomy                                | Pneumonia, respiratory failure, atelectasis                                                                                               |                                                                                               |
| Delgado-Rodríguez et al., 1997 (78) | Cohort                 | Prospective   | General surgery                              | Pneumonia                                                                                                                                 |                                                                                               |
| Thomas et al., 1997 (3)             | Cohort with comparison | Prospective   | Elective noncardiac                          | Respiratory failure, pneumonia                                                                                                            | Age > 50 y, expected length of stay at least 2 d                                              |

**Appendix Table 1—Continued**

| Exclusion Criteria                                                                                  | Other Footnotes                                                                        | Hierarchy of Research Design‡ | Study Quality | Considered All Key Confounders: Type of Surgery, Age, COPD | Patients, n | PPCs, n | Mean Age, y | Men, % |
|-----------------------------------------------------------------------------------------------------|----------------------------------------------------------------------------------------|-------------------------------|---------------|------------------------------------------------------------|-------------|---------|-------------|--------|
| None                                                                                                |                                                                                        | II-2                          | Poor          | No                                                         | 140         | 26      | 63          | 100    |
| Emergency surgery, concomitant nonvascular surgery, retroperitoneal incision                        |                                                                                        | II-3                          | Poor          | No                                                         | 181         | 97      |             |        |
| Acute infection, age > 75 y, history of seizures, unstable CAD, ASA class > III, unresectable tumor | Can't assess effect of risk factors because all infectious complications were combined | I                             | Fair          | No                                                         | 120         | 3       | 60          | 51     |
| None                                                                                                |                                                                                        | II-2                          | Fair          | No                                                         | 225         | 22      | 59          | 79     |
| Death within 12 h of surgery, incomplete database                                                   | No quantifiable risk factor data                                                       | II-3                          | Fair          | Yes                                                        | 90          | 19      | 66.8        |        |
| Death due to head trauma or hemorrhagic shock                                                       |                                                                                        | II-3                          | Poor          | No                                                         | 138         | 33      | 30          | 71     |
| None                                                                                                |                                                                                        | II-3                          | Poor          | No                                                         | 553         | 77      | NA          | NA     |
| None                                                                                                | Can't assess effect of risk factors because all complications were combined            | II-2                          | Poor          | No                                                         | 1361        | 39      | 57          | 55     |
| Atelectasis                                                                                         |                                                                                        | II-2                          | Good          | No                                                         | 2291        | 82      | 65          | NA     |
| None                                                                                                |                                                                                        | II-2                          | Poor          | No                                                         | 89          | 3       | 46          | 24     |
| None                                                                                                |                                                                                        | II-3                          | Poor          | No                                                         | 130         | 49      | 67          | 73     |
| None                                                                                                |                                                                                        | II-2                          | Fair          | No                                                         | 213         | 62      | 66          | 69     |
| Pregnant, postpartum, incomplete database                                                           |                                                                                        | II-3                          | Poor          | No                                                         | 849         | 1       | 50          | NA     |
| No consent, age < 14 y, preexisting pulmonary complication, known chronic airway disease            |                                                                                        | II-2                          | Poor          | No                                                         | 95          | 12      | 48          | 24     |
| None                                                                                                |                                                                                        | II-3                          | Poor          | No                                                         | 60          | 21      | 48.3        | 60     |
| None                                                                                                |                                                                                        | II-2                          | Poor          | No                                                         | 706         | 12      | 18          | 52     |
| None                                                                                                |                                                                                        | II-2                          | Good          | Yes                                                        | 6301        | 399     | 52          | 59     |
| Cardiac surgery, neurosurgery, preoperative ICU stay                                                |                                                                                        | II-2                          | Poor          | No                                                         | 15 059      | 41      | NA          | 50     |
| None                                                                                                |                                                                                        | II-2                          | Fair          | No                                                         | 269         | 125     | 57.5        | 70     |
| Hospital stay < 1 d                                                                                 |                                                                                        | II-2                          | Fair          | Yes                                                        | 1483        | 19      | 53          | 47     |
| None                                                                                                |                                                                                        | II-2                          | Fair          | No                                                         | 2964        | 53      | 67          | 0.48   |

**Appendix Table 1—Continued**

| Author, Year (Reference)           | Study Type†            | Timeline      | Type of Surgery                                     | Specific PPCs Studied                                                                                           | Inclusion Criteria                                                                       |
|------------------------------------|------------------------|---------------|-----------------------------------------------------|-----------------------------------------------------------------------------------------------------------------|------------------------------------------------------------------------------------------|
| Schwilk et al., 1997 (79)          | Cohort with comparison | Prospective   | All                                                 | Reintubation, laryngospasm, bronchospasm, aspiration, hypoventilation                                           |                                                                                          |
| Gillinov and Heitmiller, 1998 (80) | Cohort                 | Retrospective | Transhiatal esophagectomy                           | Pneumonia, pleural effusion requiring drainage, COPD exacerbation                                               |                                                                                          |
| Kuwano et al., 1998 (81)           | Cohort                 | Retrospective | Esophagectomy                                       | Pneumonia, respiratory failure, hypoxemia                                                                       | Right thoracoabdominal approach to esophagectomy                                         |
| Midorikawa et al., 1999 (82)       | Cohort                 | Retrospective | Hepatic resection                                   | Pneumonia, atelectasis, pleural effusion                                                                        | Hepatic tumor                                                                            |
| Manninen et al., 1999 (83)         | Cohort                 | Prospective   | Neurosurgery                                        | Respiratory rate < 8 breaths/min, oxygen saturation < 90%, dyspnea, bronchospasm, reintubation, pulmonary edema |                                                                                          |
| Reilly et al., 1999 (84)           | Cohort                 | Prospective   | Noncardiac                                          | Pneumonia, respiratory failure, ARDS, hypoxia, bronchospasm                                                     |                                                                                          |
| Ziser et al., 1999 (85)            | Cohort                 | Retrospective | All                                                 | Respiratory failure, pneumonia, ARDS                                                                            | Cirrhosis by liver biopsy or impaired liver function tests plus abnormal imaging results |
| Haga et al., 1999 (86)             | Cohort                 | Retrospective | All                                                 | Pneumonia                                                                                                       |                                                                                          |
| Carson et al., 1999 (87)           | Cohort                 | Retrospective | Hip fracture repair                                 | Pneumonia                                                                                                       |                                                                                          |
| Gibbs et al., 1999 (88)            | Cohort                 | Prospective   | Noncardiac                                          | Pneumonia, respiratory failure                                                                                  |                                                                                          |
| Brooks-Brunn, 2000 (89)            | Cohort                 | Retrospective | Total abdominal hysterectomy                        | Pneumonia, atelectasis, lasting at least 48 h                                                                   | Elective surgery, anticipated stay > 48 h                                                |
| Oñate-Ocaña et al., 2000 (90)      | Cohort                 | Retrospective | Gastric cancer                                      | Pneumonia, respiratory distress                                                                                 |                                                                                          |
| Yamashita et al., 2000 (91)        | Cohort                 | Retrospective | Gastric cancer                                      | Pneumonia                                                                                                       | Elective gastrectomy                                                                     |
| Gupta et al., 2001 (92)            | Case-control           | Retrospective | Hip or knee replacement                             | Reintubation, hypercapnia, hypoxemia                                                                            | Symptoms and signs of OSA, abnormal sleep study or suggestive overnight oximetry         |
| Girish et al., 2001 (93)           | Case series 25-99      | Prospective   | Thoracotomy, sternotomy, or upper abdominal surgery | Pneumonia, respiratory failure, atelectasis                                                                     |                                                                                          |
| Hajzman et al., 2001 (94)          | Cohort                 | Retrospective | Gastric banding for obesity surgery                 | Respiratory failure, chronic bronchitis exacerbation                                                            | Morbid obesity                                                                           |
| Kinugasa et al., 2001 (95)         | Cohort                 | Retrospective | Esophagectomy                                       | Pneumonia, pulmonary edema, atelectasis, hypoxia requiring reintubation                                         | Squamous-cell cancer of thoracic esophagus                                               |
| Polanczyk et al., 2001 (96)        | Cohort                 | Prospective   | Major elective noncardiac                           | Pneumonia, respiratory failure                                                                                  | Age > 50 y; major nonemergent, noncardiac surgery                                        |
| Polanczyk et al., 2001 (97)        | Cohort                 | Prospective   | Nonemergent major noncardiac                        | Pneumonia, respiratory failure                                                                                  | Age > 50 y; major nonemergent, noncardiac surgery                                        |
| Griffin et al., 2002 (98)          | Cohort                 | Prospective   | Ivor Lewis subtotal esophagectomy                   | Pneumonia, respiratory failure                                                                                  |                                                                                          |

**Appendix Table 1—Continued**

| Exclusion Criteria                                                                                                            | Other Footnotes                                                                         | Hierarchy of Research Design‡ | Study Quality | Considered All Key Confounders: Type of Surgery, Age, COPD | Patients, n | PPCs, n | Mean Age, y | Men, % |
|-------------------------------------------------------------------------------------------------------------------------------|-----------------------------------------------------------------------------------------|-------------------------------|---------------|------------------------------------------------------------|-------------|---------|-------------|--------|
| Age < 16 y, emergency surgery                                                                                                 |                                                                                         | II-2                          | Poor          | No                                                         | 26 961      | 1114    | NA          | NA     |
| None                                                                                                                          | Major pulmonary complications only                                                      | II-2                          | Poor          | No                                                         | 101         | 11      | 60          | 89     |
|                                                                                                                               |                                                                                         | II-3                          | Poor          | No                                                         | 178         | 23      | 63          | 88     |
| Bile duct carcinoma, gall bladder carcinoma                                                                                   |                                                                                         | II-3                          | Poor          | No                                                         | 277         | 82      | 61          | 75     |
| Surgery for chronic pain or movement disorder, postoperative ventilation > 4 h                                                |                                                                                         | II-2                          | Poor          | No                                                         | 486         | 31      | 52          | 53     |
| Minor procedures                                                                                                              | Poor functional status was inability to walk 4 blocks or climb 2 flights by self-report | II-1                          | Good          | Yes                                                        | 600         | 48      | 63          | 41     |
| Liver transplantation                                                                                                         |                                                                                         | II-2                          | Good          | Yes                                                        | 733         | 91      | 59.4        | 54     |
| None                                                                                                                          |                                                                                         | II-2                          | Good          | Yes                                                        | 1281        | 27      | 60          | 48     |
| Declined blood transfusion, metastatic cancer, several traumatic injuries                                                     |                                                                                         | II-2                          | Good          | Yes                                                        | 9598        | 337     | 80.3        | 21     |
| Minor procedures, organ transplantation                                                                                       | Estimated number of PPCs                                                                | II-2                          | Fair          | Yes                                                        | 54 215      | 6470    | 61          | 97     |
| Age < 18 y                                                                                                                    |                                                                                         | II-2                          | Poor          | No                                                         | 120         | 13      | 47          | 0      |
| Age < 18 y                                                                                                                    |                                                                                         | II-3                          | Fair          | No                                                         | 208         | 8       | 58          | 49     |
| Preoperative infection, immunocompromised, pancreatic resection, colon resection, postoperative deaths unrelated to infection | Can't assess effect of risk factors because all infectious complications were combined  | II-3                          | Poor          | No                                                         | 367         | 7       |             |        |
| None                                                                                                                          |                                                                                         | II-2                          | Poor          | No                                                         | 202         | 40      | 68          | 70     |
| No lung resection if predicted FEV <sub>1</sub> < 800 mL or 40%                                                               |                                                                                         | II-2                          | Fair          | Yes                                                        | 83          | 25      | 67          | 63     |
| None                                                                                                                          |                                                                                         | II-3                          | Poor          | No                                                         | 114         | 4       | 40          | 14     |
| None                                                                                                                          |                                                                                         | II-2                          | Poor          | No                                                         | 246         | 54      | NA          | 77     |
| AAA repair                                                                                                                    |                                                                                         | II-2                          | Good          | Yes                                                        | 4059        | 91      | 66          | 53     |
| Non-English-speaking, unable to give consent                                                                                  |                                                                                         | II-2                          | Good          | Yes                                                        | 4315        | 122     | 67          | 48     |
| None                                                                                                                          |                                                                                         | II-3                          | Poor          | No                                                         | 228         | 39      | 64          | 70     |

*Appendix Table 1—Continued*

| Author, Year (Reference)  | Study Type† | Timeline      | Type of Surgery     | Specific PPCs Studied                        | Inclusion Criteria |
|---------------------------|-------------|---------------|---------------------|----------------------------------------------|--------------------|
| Lawrence et al., 2002 (2) | Cohort      | Retrospective | Hip fracture repair | Pneumonia, respiratory failure               | Age ≥ 60 y         |
| Blouw et al., 2003 (99)   | Cohort      | Retrospective | Gastric bypass      | Atelectasis, respiratory failure, aspiration |                    |

\* AAA = abdominal aortic aneurysm; ACS = American College of Surgeons; ARDS = acute respiratory distress syndrome; ASA = American Society of Anesthesiologists; CAD = coronary artery disease; CHF = congestive heart failure; COPD = chronic obstructive pulmonary disease; ICU = intensive care unit; NA = not available; OSA = obstructive sleep apnea; PACU = post-anesthesia care unit; PPC = postoperative pulmonary complication; RCT = randomized, controlled trial.

† Numbers are numbers of participants.

‡ Based on criteria from the U.S. Preventive Services Task Force (12).

*Appendix Table 1—Continued*

| Exclusion Criteria                                                                                                                                                                                       | Other Footnotes | Hierarchy of Research Design‡ | Study Quality | Considered All Key Confounders: Type of Surgery, Age, COPD | Patients, n | PPCs, n | Mean Age, y | Men, % |
|----------------------------------------------------------------------------------------------------------------------------------------------------------------------------------------------------------|-----------------|-------------------------------|---------------|------------------------------------------------------------|-------------|---------|-------------|--------|
| Declined blood transfusion, metastatic cancer, multiple myeloma, several traumatic injuries, additional operation besides hip fracture repair, leg amputation above the knee, paraplegia or quadriplegia |                 | II-2                          | Poor          | No                                                         | 8930        | 344     | 80.2        | 79     |
| No patient consent for chart review, reoperation                                                                                                                                                         |                 | II-2                          | Poor          | No                                                         | 197         | 23      | 47          | 31     |
