# Supplementary material
Source: HighWire-hosted journal article supplement (https://www.annals.org/content/suppl/2006/04/12/144.8.581)
Supplement: Smetana_AT2_144-8-581-DC1-2.pdf [file Smetana_AT2_144-8-581-DC1-2.pdf]

**Appendix Table 2. Study Characteristics of Multivariate Studies of Clinical Predictors\***

| Author, Year (Reference)          | Study Type                | Timeline      | Type of Surgery                     | Specific PPCs Studied                                                                                       | Inclusion Criteria                                                                                                                                                                                                                  |
|-----------------------------------|---------------------------|---------------|-------------------------------------|-------------------------------------------------------------------------------------------------------------|-------------------------------------------------------------------------------------------------------------------------------------------------------------------------------------------------------------------------------------|
| Garibaldi et al., 1981 (100)      | Cohort                    | Prospective   | Thoracic and abdominal              | Pneumonia                                                                                                   |                                                                                                                                                                                                                                     |
| Windsor and Hill, 1988 (101)      | Cohort                    | Prospective   | Elective gastrointestinal resection | Pneumonia, atelectasis                                                                                      |                                                                                                                                                                                                                                     |
| Gerson et al., 1990 (102)         | Cohort                    | Prospective   | Abdominal and noncardiac thoracic   | Pneumonia, noncardiogenic pulmonary edema, pulmonary embolus                                                | Age > 65 y                                                                                                                                                                                                                          |
| Pedersen et al., 1990 (103)       | Cohort                    | Prospective   | All                                 | Intubated > 24 h                                                                                            |                                                                                                                                                                                                                                     |
| Svensson et al., 1991 (104)       | Cohort                    | Prospective   | Thoracoabdominal aortic             | Respiratory failure                                                                                         |                                                                                                                                                                                                                                     |
| Williams-Russo et al., 1992 (105) | Cohort                    | Prospective   | Noncardiac                          | Pneumonia, atelectasis                                                                                      | Diabetes or hypertension                                                                                                                                                                                                            |
| Oller Sales et al., 1992 (106)    | Cohort                    | Prospective   | Abdominal                           | Pneumonia                                                                                                   |                                                                                                                                                                                                                                     |
| Pedersen et al., 1992 (107)       | Cohort                    | Prospective   | Noncardiac                          | Respiratory failure, atelectasis, pneumonia                                                                 |                                                                                                                                                                                                                                     |
| Wong et al., 1995 (108)           | Cohort                    | Prospective   | Noncardiothoracic                   | Pneumonia, respiratory failure, bronchospasm                                                                | COPD, FEV <sub>1</sub> < 1.2 L, FEV <sub>1</sub> :FVC < 75%                                                                                                                                                                         |
| Fujita and Sakurai, 1995 (109)    | Cohort                    | Retrospective | Abdominal                           | Atelectasis, pneumonia                                                                                      |                                                                                                                                                                                                                                     |
| Lawrence et al., 1996 (110)       | Case-control              | Retrospective | Elective abdominal                  | Pneumonia, respiratory failure, bronchospasm, bronchitis, pleural effusion                                  |                                                                                                                                                                                                                                     |
| Hall et al., 1996 (111)           | Cohort                    | Prospective   | Abdominal                           | Pneumonia, respiratory failure                                                                              |                                                                                                                                                                                                                                     |
| Barisione et al., 1997 (112)      | Cohort                    | Prospective   | Abdominal                           | Pneumonia, atelectasis, respiratory failure                                                                 |                                                                                                                                                                                                                                     |
| Brooks-Brunn, 1997 (113)          | Cohort                    | Retrospective | Abdominal                           | Pneumonia, atelectasis                                                                                      |                                                                                                                                                                                                                                     |
| Bluman et al., 1998 (114)         | Cohort                    | Prospective   | Elective                            | Pneumonia, bronchospasm, reintubation, pulmonary death                                                      | General or spinal anesthesia                                                                                                                                                                                                        |
| Mitchell et al., 1998 (115)       | Cohort                    | Prospective   | Elective nonthoracic                | Bronchitis, bronchospasm, atelectasis, pneumonia, ARDS, pleural effusion, pneumothorax, respiratory failure |                                                                                                                                                                                                                                     |
| Pereira et al., 1999 (116)        | Cohort                    | Prospective   | Abdominal                           | Pneumonia, bronchitis, atelectasis, respiratory failure, bronchospasm                                       |                                                                                                                                                                                                                                     |
| Liu and Leung, 2000 (117)         | Cohort                    | Retrospective | Noncardiac                          | Respiratory failure, pneumonia, ARDS                                                                        | Age ≥ 80 y                                                                                                                                                                                                                          |
| Arozullah et al., 2000 (118)      | Cohort                    | Prospective   | Noncardiac                          | Respiratory failure                                                                                         | General, spinal, or epidural anesthesia                                                                                                                                                                                             |
| Møller et al., 2001 (119)         | Cohort                    | Prospective   | Abdominal, urologic, or orthopedic  | Pneumonia, atelectasis, pneumothorax, respiratory failure                                                   |                                                                                                                                                                                                                                     |
| Arozullah et al., 2001 (120)      | Cohort                    | Prospective   | Noncardiac                          | Pneumonia                                                                                                   | General, spinal, or epidural anesthesia                                                                                                                                                                                             |
| Leung and Dzankic, 2001 (121)     | Cohort without comparison | Prospective   | Mixed                               | Pulmonary edema, reintubation, pulmonary consolidation on chest radiograph, pneumothorax, pleural effusion  | Consecutive patients age ≥70 y, noncardiac elective (86%), emergency (14%), general (24%), orthopedic (18%), neurosurgical (13%), urologic (13%), head and neck (9%), gynecologic (9%), vascular (8%), thoracic (5%), cosmetic (1%) |
| Canturk et al., 2002 (122)        | Cohort                    | Prospective   | General                             | Pneumonia                                                                                                   |                                                                                                                                                                                                                                     |
| O'Brien et al., 2002 (123)        | Cohort                    | Prospective   | Noncardiac                          | Respiratory failure, pneumonia                                                                              | General, spinal, or epidural anesthesia                                                                                                                                                                                             |

**Appendix Table 2—Continued**

| Exclusion Criteria                                                                                   | Hierarchy of Research Design† | Study Quality | Considered All Key Confounders: Type of Surgery, Age, COPD | Patients, n | PPCs, n                        | Mean Age, y | Men, % |
|------------------------------------------------------------------------------------------------------|-------------------------------|---------------|------------------------------------------------------------|-------------|--------------------------------|-------------|--------|
|                                                                                                      | II-2                          | Poor          | Yes                                                        | 520         | 91                             |             | 38     |
| Sepsis, immunocompromised, or preoperative intravenous nutrition essential                           | II-3/C                        | Fair          | Yes                                                        | 80          | Pneumonia, 11; atelectasis, 36 |             |        |
|                                                                                                      | II-2                          | Poor          | No                                                         | 177         | 24                             | 73          | 49     |
|                                                                                                      | II-2/B-C                      | Fair          | Yes                                                        | 7306        | 348                            |             | 36     |
|                                                                                                      | II-2                          | Fair          | Yes                                                        | 98          | 59                             | 63.5        | 61     |
|                                                                                                      | II-2                          | Fair          | Yes                                                        | 278         | 16                             |             | 39     |
| Thoracoabdominal incision, splenectomy                                                               | II-2/B-C                      | Fair          | Yes                                                        | 2083        | 269                            |             | 21     |
| Regional anesthesia, incomplete database                                                             | II-2                          | Fair          | Yes                                                        | 7029        | 290                            |             |        |
| Preexisting tracheostomy, thoracic surgery                                                           | II-2                          | Fair          | Yes                                                        | 105         | 39                             | 68          | 96     |
|                                                                                                      | II-3                          | Poor          | No                                                         | 2969        | 89                             |             |        |
| Atelectasis as sole pulmonary complication                                                           | II-2                          | Good          | Yes                                                        | 164         | NA                             | 65          |        |
| Hernia repair, age < 14 y, preexisting pulmonary complication                                        | II-2                          | Good          | Yes                                                        | 1322        | 199                            | 56          | 48     |
| None                                                                                                 | II-3                          | Fair          | Yes                                                        | 361         | 49                             | 64          | 69     |
| Age < 18 y, laparoscopy, postoperative mechanical ventilation, preoperative pneumonia or atelectasis | II-2                          | Good          | Yes                                                        | 400         | 90                             | 52.5        | 35     |
| Otolaryngology surgery, neurosurgery, pipe or cigar smokers                                          | II-2                          | Fair          | Yes                                                        | 410         | 59                             | 59          | 97     |
| Regional anesthesia                                                                                  | II-2                          | Fair          | Unclear                                                    | 148         | 16                             | 61.2        |        |
|                                                                                                      | II-1                          | Fair          | Yes                                                        | 408         | 92                             | 55          | 50     |
| Ambulatory surgery                                                                                   | II-2                          | Poor          | No                                                         | 367         | 27                             | 84.4        | 38     |
| Organ transplantation, female patients, ventilator-dependent, DNR                                    | II-2                          | Good          | Yes                                                        | 81 719      | 2746                           |             |        |
| Age < 15 y                                                                                           | II-2                          | Poor          | No                                                         | 4725        | 204                            |             | 47     |
| Low-risk surgery, organ transplantation                                                              | II-2                          | Good          | Yes                                                        | 160 805     | 2466                           | 62          | 95     |
|                                                                                                      | II-2/C                        | Poor          | No                                                         | 544         | 30                             |             | 44     |
|                                                                                                      |                               |               |                                                            |             |                                |             |        |
| Hospital stay < 1 d                                                                                  | II-2                          | Poor          | Yes                                                        | 418         | 23                             |             | 43     |
| Low-risk surgery, organ transplantation                                                              | II-2                          | Fair          | Partially (emergent vs. elective surgery)                  | 49 091      | 3805                           | 61.6        | 97     |

*Appendix Table 2—Continued*

| Author, Year (Reference)        | Study Type                | Timeline      | Type of Surgery | Specific PPCs Studied                                                                                | Inclusion Criteria          |
|---------------------------------|---------------------------|---------------|-----------------|------------------------------------------------------------------------------------------------------|-----------------------------|
| Ferguson and Durkin, 2002 (124) | Cohort                    | Retrospective | Esophagectomy   | Pneumonia, respiratory failure                                                                       |                             |
| Elkhouri et al., 2004 (125)     | Cohort                    | Retrospective | Aortic aneurysm | Pneumonia, respiratory insufficiency, pulmonary embolus                                              | Infrarenal degenerative AAA |
| McAllister et al., 2005 (126)   | Cohort without comparison | Prospective   | Nonthoracic     | Respiratory failure, pneumonia, atelectasis, pneumothorax or pleural effusion requiring intervention | Elective nonthoracic        |

\* AAA = abdominal aortic aneurysm; ARDS = acute respiratory distress syndrome; COPD = chronic obstructive pulmonary disease; DNR = do not resuscitate; ICU = intensive care unit; NA = not available; PPC = postoperative pulmonary complication.

† Based on criteria from the U.S. Preventive Services Task Force (12).

*Appendix Table 2—Continued*

| Exclusion Criteria                                                                                                                              | Hierarchy of Research Design† | Study Quality | Considered All Key Confounders: Type of Surgery, Age, COPD | Patients, <i>n</i> | PPCs, <i>n</i> | Mean Age, <i>y</i> | Men, % |
|-------------------------------------------------------------------------------------------------------------------------------------------------|-------------------------------|---------------|------------------------------------------------------------|--------------------|----------------|--------------------|--------|
|                                                                                                                                                 | II-B/C                        | Poor          | No                                                         | 292                | 78             | 60                 | 79     |
|                                                                                                                                                 | II-2                          | Poor          | Yes                                                        | 355                | 45             | 73                 | 88     |
| Hospitalized, mechanically ventilated, planned ICU admission, sleep apnea, neuromuscular disease, medical problems that precluded participation | II-2                          | Good          | Yes                                                        | 1055               | 28             | 55                 | 50     |
