# Supplementary material
Source: HighWire-hosted journal article supplement (https://www.annals.org/content/suppl/2006/04/12/144.8.581)
Supplement: Smetana_AT3_144-8-581-DC1-3.pdf [file Smetana_AT3_144-8-581-DC1-3.pdf]

**Appendix Table 3. Significant Clinical Predictors in Multivariate Studies\***

| Author, Year (Reference)                | RR (95% CI)      | P Value |
|-----------------------------------------|------------------|---------|
| <b>Arozullah et al., 2001 (120)</b>     |                  |         |
| Significant factors                     |                  |         |
| AAA repair                              | 4.29 (3.34–5.50) |         |
| Thoracic                                | 3.92 (3.36–4.57) |         |
| Upper abdominal                         | 2.68 (2.38–3.03) |         |
| Neck                                    | 2.3 (1.73–3.05)  |         |
| Neurosurgery                            | 2.14 (1.66–2.75) |         |
| Vascular                                | 1.29 (1.10–1.52) |         |
| Age ≥ 80 y                              | 5.63 (4.62–6.84) |         |
| Age 70–79 y                             | 3.58 (2.97–4.33) |         |
| Age 60–69 y                             | 2.38 (1.98–2.87) |         |
| Age 50–59 y                             | 1.49 (1.23–1.81) |         |
| Totally dependent                       | 2.83 (2.33–3.43) |         |
| Partially dependent                     | 1.83 (1.63–2.06) |         |
| Weight loss > 10% in 6 mo               | 1.92 (1.68–2.18) |         |
| COPD                                    | 1.72 (1.55–1.91) |         |
| General anesthesia                      | 1.56 (1.36–1.80) |         |
| Impaired sensorium                      | 1.51 (1.26–1.82) |         |
| History of CVA                          | 1.47 (1.28–1.68) |         |
| BUN level < 8 mg/dL                     | 1.47 (1.26–1.72) |         |
| BUN level, 22–30 mg/dL                  | 1.24 (1.11–1.39) |         |
| BUN level ≥ 30 mg/dL                    | 1.41 (1.22–1.64) |         |
| Transfusion > 4 units                   | 1.35 (1.07–1.72) |         |
| Emergency surgery                       | 1.33 (1.16–1.54) |         |
| Steroid use                             | 1.33 (1.12–1.58) |         |
| Current smoker within 1 y               | 1.28 (1.17–1.42) |         |
| Alcohol > 2 drinks per day in past 2 wk | 1.24 (1.08–1.42) |         |
| <b>Leung and Dzankic, 2001 (121)</b>    |                  |         |
| Significant factors                     |                  |         |
| Emergency surgery                       | 3.6 (1.6–8.3)    | 0.003   |
| History of CHF                          | 5.7 (2.1–16)     | 0.001   |
| Invasive monitoring                     | 9.7 (3.7–25.4)   | <0.001  |
| <b>Møller et al., 2001 (119)</b>        |                  |         |
| Significant factors                     |                  |         |
| Age > 65 y                              | 1.63 (1.45–1.84) |         |
| COPD                                    | 4.21 (2.77–6.41) |         |
| <b>Arozullah et al., 2000 (118)</b>     |                  |         |
| Significant factors                     |                  |         |
| Albumin level < 20 g/L                  | 4.33 (3.99–5.52) |         |
| Albumin level, 20–30 g/L                | 2.16 (1.86–2.51) |         |
| Albumin level, 31–40 g/L                | 1.17 (1.05–1.31) |         |
| Age ≥ 70 y                              | 2.60 (2.21–3.05) |         |
| Age 60–69 y                             | 1.99 (1.70–2.33) |         |
| Age 50–59 y                             | 1.50 (1.25–1.79) |         |
| Totally dependent                       | 2.24 (1.88–2.66) |         |
| Partially dependent                     | 1.50 (1.25–1.79) |         |
| Weight loss > 10% in 6 mo               | 1.37 (1.19–1.57) |         |
| Alcohol > 2 drinks per day              | 1.19 (1.07–1.33) |         |
| Diabetes                                | 1.15 (1.00–1.33) |         |
| BUN level > 40 mg/dL                    | 2.35 (2.00–2.76) |         |
| BUN level, 31–40 mg/dL                  | 2.09 (1.78–2.45) |         |
| BUN level, 21–30 mg/dL                  | 1.31 (1.18–1.46) |         |
| Preoperative renal failure              | 1.67 (1.23–2.27) |         |
| Transfusion > 4 units                   | 1.56 (1.28–1.91) |         |
| Preoperative pneumonia                  | 1.70 (1.35–2.13) |         |
| Dyspnea at rest                         | 1.69 (1.36–2.09) |         |
| Dyspnea on minimal exertion             | 1.21 (1.09–1.34) |         |
| COPD                                    | 1.58 (1.44–1.75) |         |
| Recent smoking                          | 1.24 (1.14–1.36) |         |
| CHF                                     | 1.25 (1.07–1.47) |         |
| Impaired sensorium                      | 1.22 (1.04–1.43) |         |
| CVA                                     | 1.20 (1.05–1.38) |         |

**Appendix Table 3—Continued**

| Author, Year (Reference)                                      | RR (95% CI)        | P Value |
|---------------------------------------------------------------|--------------------|---------|
| <b>AAA surgery</b>                                            |                    |         |
| AAA surgery                                                   | 11.00 (9.20–13.10) |         |
| <b>Thoracic surgery</b>                                       |                    |         |
| Thoracic surgery                                              | 5.91 (5.15–6.78)   |         |
| <b>Peripheral vascular surgery</b>                            |                    |         |
| Peripheral vascular surgery                                   | 3.40 (2.96–3.91)   |         |
| <b>Upper abdomen surgery</b>                                  |                    |         |
| Upper abdomen surgery                                         | 3.36 (2.96–3.80)   |         |
| <b>Neurosurgery</b>                                           |                    |         |
| Neurosurgery                                                  | 2.96 (2.35–3.73)   |         |
| <b>Neck surgery</b>                                           |                    |         |
| Neck surgery                                                  | 2.13 (1.63–2.77)   |         |
| <b>Emergency surgery</b>                                      |                    |         |
| Emergency surgery                                             | 2.81 (2.54–3.11)   |         |
| <b>General anesthesia</b>                                     |                    |         |
| General anesthesia                                            | 1.91 (1.64–2.21)   |         |
| <b>Liu and Leung, 2000 (117)</b>                              |                    |         |
| Significant factors                                           |                    |         |
| CHF                                                           | 4.3 (2.3–6.9)      |         |
| Neurologic disease                                            | 3.4 (1.4–8.0)      |         |
| Arrhythmia                                                    | 2.9 (1.1–7.5)      |         |
| Intraoperative vasopressor use                                | 12.4 (2.5–63.0)    |         |
| Emergent surgery                                              | 3.0 (1.2–7.6)      |         |
| <b>Pereira et al., 1999 (116)</b>                             |                    |         |
| Significant factors                                           |                    |         |
| COPD                                                          | 2.24 (1.66–2.97)   |         |
| Surgery > 210 min                                             | 1.58 (1.15–2.18)   |         |
| Comorbid condition (hypertension, diabetes, or heart disease) | 1.48 (1.10–1.97)   |         |
| <b>Bluman et al., 1998 (114)</b>                              |                    |         |
| Significant factors                                           |                    |         |
| Current smoker                                                | 4.2 (1.2–14.8)     |         |
| General anesthesia                                            | 5.7 (2.5–12.6)     |         |
| Abnormal chest radiograph                                     | 6.3 (2.6–15.2)     |         |
| COPD                                                          | 3.8 (1.8–7.8)      |         |
| High school graduate                                          | 2.0 (1.0–4.0)      |         |
| <b>Barisione et al., 1997 (112)</b>                           |                    |         |
| Significant factors                                           |                    |         |
| Chronic bronchitis                                            | 133 (14.8–1199)    | <0.001  |
| FEV <sub>1</sub> (% predicted)                                | 0.93 (0.88–0.98)   | <0.01   |
| RV (L)                                                        | 3.11 (1.25–7.75)   | 0.01    |
| DLco (% predicted)                                            | 0.91 (0.10–8.16)   | <0.001  |
| <b>Brooks-Brunn, 1997 (113)</b>                               |                    |         |
| Significant factors                                           |                    |         |
| Age ≥ 60 y                                                    | 1.89 (1.02–3.24)   |         |
| BMI ≥ 27 kg/m <sup>2</sup>                                    | 2.82 (1.66–4.78)   |         |
| Impaired cognition                                            | 5.93 (0.92–38.19)  |         |
| History of cancer                                             | 2.23 (1.30–3.81)   |         |
| Cigarette use in past 8 wk                                    | 2.27 (1.23–4.21)   |         |
| Upper abdominal incision                                      | 2.30 (1.33–4.01)   |         |
| <b>Hall et al., 1996 (111)</b>                                |                    |         |
| Significant factors                                           |                    |         |
| ASA class III–IV                                              | NA                 |         |
| Chronic bronchitis                                            | NA                 |         |
| Preoperative stay > 5 d                                       | NA                 |         |
| Current smoker                                                | NA                 |         |
| <b>Lawrence et al., 1996 (110)</b>                            |                    |         |
| Significant factors                                           |                    |         |
| Abnormal chest examination                                    | 5.8 (1.04–32.1)    |         |
| Abnormal chest radiograph                                     | 3.2 (1.07–9.4)     |         |
| Goldman cardiac risk index, per point                         | 2.01 (1.17–3.6)    |         |
| Charlson comorbidity index, per point                         | 1.6 (1.004–2.6)    |         |

Appendix Table 3—Continued

| Author, Year (Reference)                 | RR (95% CI)             | P Value |
|------------------------------------------|-------------------------|---------|
| <b>Fujita and Sakurai, 1995 (109)</b>    |                         |         |
| Significant factors                      |                         |         |
| Age > 65 y                               | NA                      |         |
| Blood loss > 1.2 L                       | NA                      |         |
| Preoperative inhalational therapy        | NA                      |         |
| <b>Pedersen et al., 1992 (107)</b>       |                         |         |
| Significant factors                      |                         |         |
| Age ≥ 70 y                               | 7.24 (3.72–14.10)       |         |
| Age 50–69 y                              | 4.01 (2.14–7.52)        |         |
| Age 30–49 y                              | 2.23 (1.14–4.33)        |         |
| COPD                                     | 3.06 (1.88–5.00)        |         |
| Pancuronium use                          | 3.00 (2.07–4.36)        |         |
| Atracurium use                           | 1.35 (0.78–2.34)        |         |
| Surgery > 3 h                            | 3.22 (2.31–4.50)        |         |
| Abdominal surgery                        | 3.63 (2.41–5.48)        |         |
| Major orthopedic surgery                 | 4.27 (0.71–2.29)        |         |
| Emergency surgery                        | 3.39 (2.48–4.63)        |         |
| <b>Williams-Russo et al., 1992 (105)</b> |                         |         |
| Significant factors                      |                         |         |
| AAA repair                               | NA                      |         |
| COPD                                     | NA                      |         |
| <b>Oller Sales et al., 1992 (106)</b>    |                         |         |
| Significant factors                      |                         |         |
| Duration of anesthesia                   | "Associated"            |         |
| ASA class                                | "Associated"            |         |
| Gastric surgery                          | "As were"               |         |
| Intestinal surgery                       | "Lesser extent"         |         |
| Age                                      | "Weak"                  |         |
| <b>Svensson et al., 1991 (104)</b>       |                         |         |
| Significant factors                      |                         |         |
| COPD                                     | 4.86                    | 0.0084  |
| Cigarette use                            | 10.3                    | 0.0084  |
| Cardiac complication                     | 19.1                    | 0.0091  |
| Renal complication                       | 21.3                    | 0.004   |
| <b>Gerson et al., 1990 (102)</b>         |                         |         |
| Significant factor                       |                         |         |
| Poor exercise capacity                   | 7.1 (5.10–9.89)         |         |
| <b>Windsor and Hill, 1998 (101)</b>      |                         |         |
| Significant factors                      |                         |         |
| Upper vs. lower abdominal incision       | 9.68 (1.53–61.09)       | 0.015   |
| Protein depletion                        | 278.66 (0.14–570575.06) | 0.14    |
| Age                                      | 1.03 (0.97–1.09)        | 0.34    |
| Duration of surgery                      | 1.34 (0.66–2.71)        | 0.42    |
| Obesity                                  | 2.75 (0.11–69.69)       | 0.54    |
| Smoking                                  | 1.48 (0.28–7.81)        | 0.64    |
| <b>Garibaldi et al., 1981 (100)</b>      |                         |         |
| Significant factors                      |                         |         |
| Longer duration of surgery               | NA                      |         |
| Upper abdominal surgery                  | NA                      |         |
| Abnormal serum albumin level             | NA                      |         |
| History of cigarette smoking             | NA                      |         |
| <b>Mitchell et al., 1998 (115)</b>       |                         |         |
| Significant factors                      |                         |         |
| Postoperative nasogastric tube           | 21.8                    |         |
| Preoperative sputum production           | 4.6                     |         |
| Anesthesia time                          | No data                 |         |

Appendix Table 3—Continued

| Author, Year (Reference)                                | RR (95% CI)       | P Value |
|---------------------------------------------------------|-------------------|---------|
| <b>Pedersen et al., 1990 (103)</b>                      |                   |         |
| Significant factors                                     |                   |         |
| Age 50–69 y                                             | 4.26 (2.37–7.68)  | <0.001  |
| Age ≥ 70 y                                              | 5.70 (3.04–10.67) | <0.001  |
| COPD                                                    | 2.92 (1.86–4.58)  | <0.001  |
| Major operation                                         | 4.85 (3.35–7.05)  | <0.001  |
| Emergency operation                                     | 2.51 (1.87–3.37)  | <0.001  |
| General anesthesia with muscle relaxant                 | 2.83 (1.99–4.03)  | <0.001  |
| <b>Ferguson and Durkin, 2002 (124)</b>                  |                   |         |
| Significant factors                                     |                   |         |
| Age per 10-y increment                                  | 1.31 (0.99–1.74)  | 0.059   |
| FEV <sub>1</sub> per 10% decrement                      | 1.21 (1.07–1.38)  | 0.003   |
| Thoracotomy and laparotomy                              | 2.49 (1.30–4.76)  | 0.006   |
| <b>O'Brien et al., 2002 (123)</b>                       |                   |         |
| Significant factors                                     |                   |         |
| Creatinine level, 1.5–2.0 mg/dL                         | 1.42 (1.22–1.64)  |         |
| Creatinine level, 2.0–2.5 mg/dL                         | 1.39 (1.11–1.75)  |         |
| Creatinine level, 2.5–3.0 mg/dL                         | 1.60 (1.23–2.07)  |         |
| Creatinine level > 3.0 mg/dL                            | 1.58 (1.31–1.89)  |         |
| <b>Canturk et al., 2002 (122)</b>                       |                   |         |
| Significant factors                                     |                   |         |
| Surgery > 1 h duration                                  | 1.06 (1.05–1.13)  | 0.034   |
| HDL cholesterol level ≤ 35 mg/dL                        | 1.16 (1.05–1.29)  | 0.05    |
| COPD                                                    | 2.5 (1.1–5.5)     | 0.04    |
| <b>Wong et al., 1995 (108)</b>                          |                   |         |
| Significant factors                                     |                   |         |
| Abdominal incision                                      | 18 (1.2–97.1)     | 0.0001  |
| Anesthesia duration (per hour)                          | 1.78 (1.14–2.71)  | 0.0001  |
| ASA physical status 4 or 5                              | 41 (5.8–292.4)    | 0.0002  |
| General anesthesia                                      | 20 (3.1–127.0)    | 0.0008  |
| FEV <sub>1</sub> :FVC ≤ 0.5                             | 16 (2.7–88.4)     | 0.0020  |
| Shapiro score ≥ 5                                       | 10 (1.1–89.4)     | 0.0345  |
| <b>Elkhouri et al., 2004 (125)</b>                      |                   |         |
| Significant factors                                     |                   |         |
| Endovascular aortic repair (compared with open surgery) | 0.14 (0.04–0.47)  | 0.002   |
| <b>McAllister et al., 2005 (126)</b>                    |                   |         |
| Significant factors                                     |                   |         |
| Age ≥ 65 y                                              | 5.9               | <0.001  |
| Positive cough test result                              | 3.8               | 0.01    |
| Perioperative nasogastric tube                          | 7.7               | <0.001  |
| Duration ≥ 2.5 h                                        | 3.3               | 0.008   |

\* To convert BUN values to mmol/L, multiply by 0.357. To convert creatinine values to μmol/L, multiply by 88.4. To convert HDL cholesterol values to mmol/L, multiply by 0.02586. AAA = abdominal aortic aneurysm; ASA = American Society of Anesthesiologists; BMI = body mass index; BUN = blood urea nitrogen; CHF = congestive heart failure; COPD = chronic obstructive pulmonary disease; CVA = cerebrovascular accident; DLCO = diffusing capacity of carbon monoxide; HDL = high-density lipoprotein; NA = not available; RR = relative risk; RV = residual volume.
