# Supplementary material
Source: HighWire-hosted journal article supplement (https://www.annals.org/content/suppl/2006/04/12/144.8.581)
Supplement: Smetana_AT4_144-8-581-DC1-4.pdf [file Smetana_AT4_144-8-581-DC1-4.pdf]

**Appendix Table 4. Detailed Results of Univariate Studies on the Influence of Age on Postoperative Pulmonary Complication Rates\***

| Author, Year (Reference)            | Patients, n | PPCs, n | Mean Age if PPC, y | Mean Age if No PPC, y | Patients Age < 60 y with PPC, n | Total Patients Age < 60 y, n | Patients Age > 60 y with PPC, n | Total Patients Age > 60 y, n |
|-------------------------------------|-------------|---------|--------------------|-----------------------|---------------------------------|------------------------------|---------------------------------|------------------------------|
| Warren and Grimwood, 1980 (20)      | 194         | 42      | 58.1               | 47.7                  |                                 |                              |                                 |                              |
| Seymour and Pringle, 1983 (22)      | 258         | 102     |                    |                       |                                 |                              |                                 |                              |
| Beard et al., 1986 (26)             | 2293        | 44      |                    |                       |                                 |                              |                                 |                              |
| Fogh et al., 1987 (28)              | 125         | 125     |                    |                       | 14                              | 57                           | 6                               | 68                           |
| Seymour and Vaz, 1989 (41)          | 288         | 40      |                    |                       |                                 |                              |                                 |                              |
| Vodinh et al., 1989 (40)            | 151         | 56      | 62                 | 60.4                  |                                 |                              |                                 |                              |
| Ejlertsen et al., 1989 (39)         | 130         | 11      | 54.7               | 53.3                  |                                 |                              |                                 |                              |
| Nielsen et al., 1989 (38)           | 128         | 89      | 58.7               | 50.4                  |                                 |                              |                                 |                              |
| Arriaga et al., 1990 (45)           | 414         | 74      |                    |                       |                                 |                              |                                 |                              |
| Hall et al., 1991 (47)              | 1000        | 232     |                    |                       | 73                              | 562                          | 159                             | 438                          |
| Evaldson et al., 1992 (55)          | 2361        | 8       |                    |                       |                                 |                              |                                 |                              |
| Kispert et al., 1992 (52)           | 147         | 19      |                    |                       |                                 |                              |                                 |                              |
| Dilworth et al., 1991 (51)          | 127         | 23      |                    |                       |                                 |                              |                                 |                              |
| Kroenke et al., 1992 (50)           | 107         | 34      | 65                 | 66                    |                                 |                              |                                 |                              |
| Iwamoto et al., 1993 (56)           | 4380        | 30      |                    |                       |                                 |                              |                                 |                              |
| Calligaro et al., 1993 (60)         | 181         | 97      |                    |                       |                                 |                              |                                 |                              |
| Ephgrave et al., 1993 (59)          | 140         | 26      | 63.1               | 64.8                  |                                 |                              |                                 |                              |
| Lawrence et al., 1995 (67)          | 2291        | 82      | 65                 | 65                    |                                 |                              |                                 |                              |
| Wong et al., 1995 (108)             | 105         | 39      |                    |                       |                                 |                              |                                 |                              |
| Rose et al., 1996 (76)              | 15 059      | 41      |                    |                       | 28                              | 9442                         | 13                              | 5617                         |
| Kocabas et al., 1996 (73)           | 60          | 21      | 55.5               | 44.3                  |                                 |                              |                                 |                              |
| Delgado-Rodríguez et al., 1997 (78) | 1483        | 19      |                    |                       |                                 |                              |                                 |                              |
| Gillinov and Heitmiller, 1998 (80)  | 101         | 11      | 69.3               | 59.2                  |                                 |                              |                                 |                              |
| Brooks-Brunn, 2000 (89)             | 120         | 13      | 56.1               | 46.3                  | 7                               | 96                           | 6                               | 24                           |
| Polanczyk et al., 2001 (97)         | 4315        | 122     |                    |                       | 20                              | 1015                         | 102                             | 3300                         |
| Kinugasa et al., 2001 (95)          | 246         | 54      |                    |                       |                                 |                              |                                 |                              |
| Griffin et al., 2002 (98)           | 228         | 39      | 60.7               | 63                    |                                 |                              |                                 |                              |

\* PPC = postoperative pulmonary complication.

*Appendix Table 4—Continued*

| Patients Age < 65 y with PPC, n | Total Patients Age < 65 y, n | Patients Age > 65 y with PPC, n | Total Patients Age > 65 y, n | Patients Age < 70 y with PPC, n | Total Patients Age < 70 y, n | Patients Age > 70 y with PPC, n | Total Patients Age > 70 y, n |
|---------------------------------|------------------------------|---------------------------------|------------------------------|---------------------------------|------------------------------|---------------------------------|------------------------------|
| 0                               | 0                            | 102                             | 285                          |                                 |                              |                                 |                              |
|                                 |                              |                                 |                              | 34                              | 1936                         | 10                              | 357                          |
|                                 |                              |                                 |                              | 17                              | 85                           | 6                               | 40                           |
| 0                               | 0                            | 40                              | 288                          |                                 |                              |                                 |                              |
|                                 |                              |                                 |                              |                                 |                              |                                 |                              |
|                                 |                              |                                 |                              |                                 |                              |                                 |                              |
| 28                              | 212                          | 46                              | 172                          |                                 |                              |                                 |                              |
|                                 |                              |                                 |                              |                                 |                              |                                 |                              |
|                                 |                              |                                 |                              | 24                              | 112                          | 2                               | 15                           |
|                                 |                              |                                 |                              |                                 |                              |                                 |                              |
| 14                              | 3224                         | 16                              | 1156                         |                                 |                              |                                 |                              |
|                                 |                              |                                 |                              | 13                              | 109                          | 16                              | 72                           |
|                                 |                              |                                 |                              |                                 |                              |                                 |                              |
| 18                              | 43                           | 21                              | 62                           |                                 |                              |                                 |                              |
|                                 |                              |                                 |                              |                                 |                              |                                 |                              |
| 10                              | 1077                         | 9                               | 396                          |                                 |                              |                                 |                              |
|                                 |                              |                                 |                              |                                 |                              |                                 |                              |
|                                 |                              |                                 |                              | 49                              | 2661                         | 73                              | 1654                         |
|                                 |                              |                                 |                              | 29                              | 149                          | 25                              | 55                           |
|                                 |                              |                                 |                              |                                 |                              |                                 |                              |
