# Supplementary material
Source: HighWire-hosted journal article supplement (https://www.annals.org/content/suppl/2006/04/12/144.8.581)
Supplement: Smetana_AT5_144-8-581-DC1-5.pdf [file Smetana_AT5_144-8-581-DC1-5.pdf]

**Appendix Table 5. Detailed Results of Univariate Studies of the Influence of American Society of Anesthesiologists' Class on Postoperative Pulmonary Complication Rates\***

| Author, Year (Reference)            | Patients,<br><i>n</i> | PPCs,<br><i>n</i> | ASA Class I, <i>n</i> |          | ASA Class II, <i>n</i> |          | ASA Class III, <i>n</i> |          | ASA Class IV, <i>n</i> |          |
|-------------------------------------|-----------------------|-------------------|-----------------------|----------|------------------------|----------|-------------------------|----------|------------------------|----------|
|                                     |                       |                   | PPCs                  | Patients | PPCs                   | Patients | PPCs                    | Patients | PPCs                   | Patients |
| Seymour and Vaz, 1989 (41)          | 288                   | 112               |                       |          | 44                     | 157      | 53                      | 97       | 15                     | 24       |
| Kroenke et al., 1992 (50)           | 107                   | 34                |                       | 0        | 1                      | 10       | 18                      | 65       | 12                     | 26       |
| Calligaro et al., 1993 (60)         | 181                   | 97                |                       | 0        | 4                      | 32       | 19                      | 139      | 5                      | 10       |
| Wong et al., 1995 (108)             | 105                   | 39                |                       |          |                        |          |                         |          | 21                     | 28       |
| Kocabas et al., 1996 (73)           | 60                    | 21                | 2                     | 18       | 8                      | 24       | 11                      | 18       |                        | 0        |
| Rose et al., 1996 (76)              | 15 059                | 41                |                       |          |                        |          |                         |          | 6                      | 438      |
| Warner et al., 1996 (74)            | 706                   | 12                | 2                     | 319      | 2                      | 297      | 7                       | 81       | 2                      | 8        |
| Wolters et al., 1996 (75)           | 6301                  | 399               | 13                    | 1133     | 115                    | 2685     | 207                     | 2181     | 29                     | 290      |
| Delgado-Rodríguez et al., 1997 (78) | 1483                  | 19                |                       |          |                        |          | 12                      | 272      |                        |          |

\* ASA = American Society of Anesthesiologists; PPC = postoperative pulmonary complication.
