# Supplementary material
Source: HighWire-hosted journal article supplement (https://www.annals.org/content/suppl/2006/04/12/144.8.581)
Supplement: Smetana_AT6_144-8-581-DC1-6.pdf [file Smetana_AT6_144-8-581-DC1-6.pdf]

**Appendix Table 6. Detailed Results of Univariate Studies of the Influence of Obesity and Diabetes on Postoperative Pulmonary Complication Rates\***

| Author, Year (Reference)            | Patients,<br><i>n</i> | PPCs,<br><i>n</i> | Patients with Diabetes |                | Definition of Obesity         | Patients with Obesity |                |
|-------------------------------------|-----------------------|-------------------|------------------------|----------------|-------------------------------|-----------------------|----------------|
|                                     |                       |                   | Total, <i>n</i>        | PPCs, <i>n</i> |                               | Total, <i>n</i>       | PPCs, <i>n</i> |
| Poe et al., 1988 (32)               | 209                   | 31                |                        |                | >120% ideal body weight       | 52                    | 6              |
| Hall et al., 1991 (47)              | 1000                  | 232               |                        |                | BMI > 25 kg/m <sup>2</sup>    | 102                   | 27             |
| Dilworth et al., 1991 (51)          | 127                   | 26                |                        |                | BMI > 1 SD above mean         | 92                    | 15             |
| Kroenke et al., 1992 (50)           | 107                   | 34                | 25                     | 10             |                               |                       |                |
| Calligaro et al., 1993 (60)         | 181                   | 97                |                        |                | >120% ideal body weight       | 36                    | 7              |
| Ephgrave et al., 1993 (59)          | 140                   | 26                | 19                     | 4              |                               |                       |                |
| Weber et al., 1993 (62)             | 225                   | 22                | 16                     | 3              |                               |                       |                |
| Choban et al., 1995 (71)            | 849                   | 1                 |                        |                | BMI ≥ 27 kg/m <sup>2</sup>    | 313                   | 1              |
| Delgado-Rodríguez et al., 1997 (78) | 1483                  | 19                |                        |                | BMI > 33.75 kg/m <sup>2</sup> | 142                   | 6              |
| Thomas et al., 1997 (3)             | 2964                  | 53                |                        |                | BMI ≥ 30 kg/m <sup>2</sup>    | 528                   | 10             |
| Kuwano et al., 1998 (81)            | 178                   | 23                | 8                      | 2              |                               |                       |                |
| Yamashita et al., 2000 (91)         | 367                   | 7                 | 83                     | 5              |                               |                       |                |
| Hajzman et al., 2001 (94)           | 114                   | 4                 |                        |                | Morbid obesity                | 114                   | 4              |
| Blouw et al., 2003 (99)             | 207                   | 23                |                        |                | Morbid obesity                | 197                   | 23             |

\* BMI = body mass index; PPC = postoperative pulmonary complication.
