# Supplementary material
Source: HighWire-hosted journal article supplement (https://www.annals.org/content/suppl/2006/04/12/144.8.581)
Supplement: Smetana_AT7_144-8-581-DC1-7.pdf [file Smetana_AT7_144-8-581-DC1-7.pdf]

**Appendix Table 7. Detailed Results of Univariate Postoperative Pulmonary Complication Rates Stratified by Surgical Site\***

| Author, Year<br>(Reference)         | Patients,<br><i>n</i> | PPCs,<br><i>n</i> | Any Abdominal<br>Surgery          |                       | Vertical Abdominal<br>Incision    |                       | Upper Abdominal<br>Surgery        |                       | Lower Abdominal<br>Surgery        |                       |
|-------------------------------------|-----------------------|-------------------|-----------------------------------|-----------------------|-----------------------------------|-----------------------|-----------------------------------|-----------------------|-----------------------------------|-----------------------|
|                                     |                       |                   | Patients<br>with<br>PPC, <i>n</i> | Patients,<br><i>n</i> |
| Fasth et al., 1980 (19)             | 153                   | 2                 |                                   |                       |                                   |                       |                                   |                       | 2                                 | 153                   |
| Warren and Grimwood,<br>1980 (20)   | 194                   | 42                | 42                                | 194                   |                                   |                       | 42                                | 194                   |                                   |                       |
| Buckwalter and Herbst,<br>1983 (24) | 565                   | 3                 | 3                                 | 565                   |                                   |                       |                                   |                       |                                   |                       |
| Diehl et al., 1983 (23)             | 557                   | 33                |                                   |                       |                                   |                       |                                   |                       |                                   |                       |
| Seymour and Pringle,<br>1983 (22)   | 258                   | 102               | 53                                | 111                   |                                   |                       | 32                                | 64                    | 21                                | 47                    |
| Wirén and Janzon,<br>1983 (21)      | 52                    | 28                | 28                                | 52                    |                                   |                       | 28                                | 52                    |                                   |                       |
| Fasth et al., 1987 (30)             | 92                    | 5                 | 5                                 | 92                    |                                   |                       |                                   |                       | 5                                 | 92                    |
| Fogh et al., 1987 (28)              | 125                   | 23                | 23                                | 125                   |                                   |                       |                                   |                       |                                   |                       |
| Matsumata et al.,<br>1987 (27)      | 80                    | 40                | 40                                | 80                    |                                   |                       | 40                                | 80                    |                                   |                       |
| Hollier et al., 1988 (31)           | 101                   | 33                | 154                               | 270                   |                                   |                       |                                   |                       |                                   |                       |
| Jørgensen et al.,<br>1988 (33)      | 259                   | 47                | 47                                | 259                   |                                   |                       |                                   |                       |                                   |                       |
| Mellors et al.,<br>1988 (36)        | 434                   | 4                 | 4                                 | 434                   |                                   |                       |                                   |                       |                                   |                       |
| Poe et al., 1988 (32)               | 209                   | 31                | 31                                | 209                   | 9                                 | 58                    | 31                                | 209                   |                                   |                       |
| Tartter, 1988 (35)                  | 343                   | 6                 | 3                                 | 343                   |                                   |                       |                                   |                       | 6                                 | 343                   |
| Ejlertsen et al.,<br>1989 (39)      | 130                   | 11                | 11                                | 130                   |                                   |                       | 11                                | 130                   |                                   |                       |
| Nielsen et al.,<br>1989 (38)        | 128                   | 89                | 89                                | 128                   |                                   |                       | 89                                | 128                   |                                   |                       |
| Seymour and Vaz,<br>1989 (41)       | 288                   | 40                | 73                                | 129                   |                                   |                       | 45                                | 70                    | 28                                | 59                    |
| Vodinh et al.,<br>1989 (40)         | 151                   | 56                |                                   |                       |                                   |                       |                                   |                       |                                   |                       |
| Arriaga et al.,<br>1990 (45)        | 414                   | 74                |                                   |                       |                                   |                       |                                   |                       |                                   |                       |
| Koness et al., 1990 (42)            | 109                   | 16                | 16                                | 109                   |                                   |                       |                                   |                       |                                   |                       |
| Hall et al., 1991 (47)              | 1000                  | 232               | 232                               | 1000                  |                                   |                       | 161                               | 439                   | 81                                | 477                   |
| Pinto et al., 1991 (46)             | 196                   | 18                | 18                                | 196                   |                                   |                       | 18                                | 196                   |                                   |                       |
| Braga et al., 1992 (54)             | 285                   | 8                 | 8                                 | 285                   |                                   |                       |                                   |                       |                                   |                       |
| Dilworth et al.,<br>1991 (51)       | 127                   | 26                | 23                                | 127                   | 14                                | 44                    | 26                                | 127                   |                                   |                       |
| Evaldson et al.,<br>1992 (55)       | 2361                  | 8                 | 8                                 | 2361                  |                                   |                       |                                   |                       | 8                                 | 2361                  |
| Katz et al., 1992 (49)              | 64                    | 24                |                                   |                       |                                   |                       |                                   |                       |                                   |                       |
| Kispert et al., 1992 (52)           | 147                   | 19                |                                   |                       |                                   |                       |                                   |                       |                                   |                       |
| Brooks-Brunn,<br>1992 (53)          | 263                   | 54                | 54                                | 263                   |                                   |                       | 54                                | 263                   |                                   |                       |
| Kroenke et al.,<br>1992 (50)        | 107                   | 34                | 11                                | 16                    |                                   |                       | 4                                 | 8                     |                                   |                       |
| Calligaro et al.,<br>1993 (60)      | 181                   | 97                |                                   |                       |                                   |                       |                                   |                       |                                   |                       |
| Ephgrave et al.,<br>1993 (59)       | 140                   | 26                | 5                                 | 66                    |                                   |                       |                                   |                       |                                   |                       |
| Heiss et al., 1993 (61)             | 120                   | 3                 | 3                                 | 120                   |                                   |                       |                                   |                       | 3                                 | 120                   |
| Jayr et al., 1993 (57)              | 51                    | 12                |                                   |                       |                                   |                       |                                   |                       |                                   |                       |
| Weber et al., 1993 (62)             | 225                   | 22                |                                   |                       |                                   |                       |                                   |                       |                                   |                       |
| Charash et al.,<br>1994 (64)        | 138                   | 33                |                                   |                       |                                   |                       |                                   |                       |                                   |                       |
| Gefke et al., 1994 (65)             | 553                   | 77                |                                   |                       |                                   |                       |                                   |                       |                                   |                       |
| Money et al., 1994 (63)             | 90                    | 19                |                                   |                       |                                   |                       |                                   |                       |                                   |                       |
| Gilling-Smith et al.,<br>1995 (69)  | 130                   | 49                |                                   |                       |                                   |                       |                                   |                       |                                   |                       |
| Lawrence et al.,<br>1995 (67)       | 2291                  | 82                | 82                                | 2291                  |                                   |                       |                                   |                       |                                   |                       |
| Liedman et al.,<br>1995 (70)        | 213                   | 62                | 32                                | 132                   |                                   |                       | 32                                | 132                   |                                   |                       |
| Wong et al.,<br>1995 (108)          | 105                   | 39                | 25                                | 36                    |                                   |                       |                                   |                       | 25                                | 36                    |

Appendix Table 7—Continued

| Aortic or<br>Intra-Abdominal Vascular |                       | Head and Neck                     |                       | Esophageal                        |                       | Hip                               |                       | Urologic or Gynecologic           |                       |
|---------------------------------------|-----------------------|-----------------------------------|-----------------------|-----------------------------------|-----------------------|-----------------------------------|-----------------------|-----------------------------------|-----------------------|
| Patients<br>with<br>PPC, <i>n</i>     | Patients,<br><i>n</i> | Patients<br>with<br>PPC, <i>n</i> | Patients,<br><i>n</i> | Patients<br>with<br>PPC, <i>n</i> | Patients,<br><i>n</i> | Patients<br>with<br>PPC, <i>n</i> | Patients,<br><i>n</i> | Patients<br>with<br>PPC, <i>n</i> | Patients,<br><i>n</i> |
| 33                                    | 557                   |                                   |                       |                                   |                       |                                   |                       |                                   |                       |
| 33                                    | 101                   |                                   |                       |                                   |                       |                                   |                       |                                   |                       |
| 39                                    | 70                    |                                   |                       |                                   |                       |                                   |                       |                                   |                       |
|                                       |                       | 74                                | 414                   |                                   |                       |                                   |                       |                                   |                       |
| 24                                    | 64                    |                                   |                       |                                   |                       |                                   |                       | 8                                 | 2361                  |
| 15                                    | 67                    |                                   |                       |                                   |                       |                                   |                       |                                   |                       |
| 1                                     | 3                     | 3                                 | 11                    |                                   |                       | 3                                 | 6                     | 2                                 | 20                    |
| 97                                    | 181                   |                                   |                       |                                   |                       |                                   |                       |                                   |                       |
| 7                                     | 36                    | 9                                 | 28                    |                                   |                       |                                   |                       |                                   |                       |
| 12                                    | 51                    |                                   |                       |                                   |                       |                                   |                       |                                   |                       |
|                                       |                       | 22                                | 225                   |                                   |                       |                                   |                       |                                   |                       |
|                                       |                       |                                   |                       |                                   |                       | 33                                | 138                   |                                   |                       |
| 77                                    | 553                   |                                   |                       |                                   |                       |                                   |                       |                                   |                       |
| 19                                    | 90                    |                                   |                       |                                   |                       |                                   |                       |                                   |                       |
| 49                                    | 130                   |                                   |                       |                                   |                       |                                   |                       |                                   |                       |
|                                       |                       |                                   |                       |                                   |                       |                                   |                       |                                   |                       |
|                                       |                       |                                   |                       | 30                                | 81                    |                                   |                       |                                   |                       |

**Appendix Table 7—Continued**

| Author, Year<br>(Reference)            | Patients,<br><i>n</i> | PPCs,<br><i>n</i> | Any Abdominal<br>Surgery          |                       | Vertical Abdominal<br>Incision    |                       | Upper Abdominal<br>Surgery        |                       | Lower Abdominal<br>Surgery        |                       |
|----------------------------------------|-----------------------|-------------------|-----------------------------------|-----------------------|-----------------------------------|-----------------------|-----------------------------------|-----------------------|-----------------------------------|-----------------------|
|                                        |                       |                   | Patients<br>with<br>PPC, <i>n</i> | Patients,<br><i>n</i> |
| Hall et al., 1996 (72)                 | 95                    | 12                | 10                                | 58                    |                                   |                       | 10                                | 58                    |                                   |                       |
| Kocabas et al.,<br>1996 (73)           | 60                    | 21                | 21                                | 60                    | 18                                | 48                    | 21                                | 60                    |                                   |                       |
| Rose et al., 1996 (76)                 | 15 059                | 41                | 12                                | 2700                  |                                   |                       |                                   |                       |                                   |                       |
| Delgado-Rodríguez et<br>al., 1997 (78) | 1483                  | 19                | 19                                | 1187                  |                                   |                       | 13                                | 350                   |                                   |                       |
| Ferguson et al.,<br>1997 (77)          | 269                   | 125               |                                   |                       |                                   |                       |                                   |                       |                                   |                       |
| Gillinov and Heitmiller,<br>1998 (80)  | 101                   | 11                |                                   |                       |                                   |                       |                                   |                       |                                   |                       |
| Kuwano et al.,<br>1998 (81)            | 178                   | 23                |                                   |                       |                                   |                       |                                   |                       |                                   |                       |
| Carson et al., 1999 (87)               | 9598                  | 337               |                                   |                       |                                   |                       |                                   |                       |                                   |                       |
| Midorikawa et al.,<br>1999 (82)        | 277                   | 82                | 82                                | 277                   |                                   |                       | 82                                | 277                   |                                   |                       |
| Brooks-Brunn,<br>2000 (89)             | 120                   | 13                | 120                               | 13                    | 8                                 | 37                    |                                   |                       | 13                                | 120                   |
| Oñate-Ocaña et al.,<br>2000 (90)       | 208                   | 8                 | 8                                 | 208                   |                                   |                       | 8                                 | 208                   |                                   |                       |
| Yamashita et al.,<br>2000 (91)         | 367                   | 7                 | 7                                 | 367                   |                                   |                       |                                   |                       |                                   |                       |
| Kinugasa et al.,<br>2001 (95)          | 246                   | 54                |                                   |                       |                                   |                       |                                   |                       |                                   |                       |
| Griffin et al., 2002 (98)              | 228                   | 39                |                                   |                       |                                   |                       |                                   |                       |                                   |                       |
| Lawrence et al.,<br>2002 (2)           | 8930                  | 344               |                                   |                       |                                   |                       |                                   |                       |                                   |                       |

\* PPC = postoperative pulmonary complication.

*Appendix Table 7—Continued*

| Aortic or<br>Intra-Abdominal Vascular |                       | Head and Neck                     |                       | Esophageal                        |                       | Hip                               |                       | Urologic or Gynecologic           |                       |
|---------------------------------------|-----------------------|-----------------------------------|-----------------------|-----------------------------------|-----------------------|-----------------------------------|-----------------------|-----------------------------------|-----------------------|
| Patients<br>with<br>PPC, <i>n</i>     | Patients,<br><i>n</i> | Patients<br>with<br>PPC, <i>n</i> | Patients,<br><i>n</i> | Patients<br>with<br>PPC, <i>n</i> | Patients,<br><i>n</i> | Patients<br>with<br>PPC, <i>n</i> | Patients,<br><i>n</i> | Patients<br>with<br>PPC, <i>n</i> | Patients,<br><i>n</i> |
|                                       |                       |                                   |                       | 125                               | 269                   |                                   |                       |                                   |                       |
|                                       |                       |                                   |                       | 11                                | 101                   |                                   |                       |                                   |                       |
|                                       |                       |                                   |                       | 23                                | 178                   |                                   |                       |                                   |                       |
|                                       |                       |                                   |                       |                                   |                       | 337                               | 9598                  |                                   |                       |
|                                       |                       |                                   |                       |                                   |                       |                                   |                       |                                   |                       |
|                                       |                       |                                   |                       | 54                                | 246                   |                                   |                       |                                   |                       |
|                                       |                       |                                   |                       | 39                                | 228                   |                                   |                       |                                   |                       |
|                                       |                       |                                   |                       |                                   |                       | 344                               | 8930                  |                                   |                       |
