# Supplementary material
Source: HighWire-hosted journal article supplement (https://www.annals.org/content/suppl/2006/04/12/144.8.581)
Supplement: Smetana_AT8_144-8-581-DC1-8.pdf [file Smetana_AT8_144-8-581-DC1-8.pdf]

**Appendix Table 8. Characteristics of Studies of Laboratory Predictors\***

| Author, Year (Reference)        | Study Type                      | Timeline      | Type of Surgery                                                                              | Specific PPCs Studied                                                                                       |
|---------------------------------|---------------------------------|---------------|----------------------------------------------------------------------------------------------|-------------------------------------------------------------------------------------------------------------|
| Poe et al., 1982 (137)          | Cohort                          | Retrospective | Upper abdominal, appendectomy, hernia repair, gynecologic, breast, thyroid, major orthopedic | Respiratory infection, atelectasis                                                                          |
| Fogh et al., 1987 (28)          | Cohort without comparison group | Prospective   | Major abdominal                                                                              | Pneumonia, atelectasis, respiratory failure                                                                 |
| Windsor and Hill, 1988 (138)    | Cohort with comparison          | Prospective   | Elective major gastrointestinal resection                                                    | Pneumonia                                                                                                   |
| Cooper and Primrose, 1989 (139) | Cohort                          | Prospective   | Major elective abdominal                                                                     | Atelectasis, pneumonia                                                                                      |
| Gerson et al., 1990 (102)       | Cohort without comparison group | Prospective   | Abdominal and noncardiac thoracic                                                            | Pneumonia, noncardiogenic pulmonary edema, pulmonary embolus                                                |
| Kispert et al., 1992 (52)       | Cohort without comparison group | Retrospective | Major vascular                                                                               | Pneumonia, respiratory failure, ARDS                                                                        |
| Kroenke et al., 1992 (50)       | Cohort without comparison group | Retrospective | All                                                                                          | All                                                                                                         |
| Calligaro et al., 1993 (60)     | Cohort without comparison group | Retrospective | AAA repair                                                                                   | Pneumonia, respiratory failure                                                                              |
| Jayr et al., 1993 (57)          | Cohort without comparison group | Prospective   | Intra-abdominal vascular                                                                     | Respiratory failure                                                                                         |
| Wong et al., 1995 (108)         | Cohort without comparison group | Prospective   | Noncardiothoracic                                                                            | Pneumonia, respiratory failure, bronchospasm                                                                |
| Kocabas et al., 1996 (73)       | Cohort without comparison group | Prospective   | Elective upper abdominal                                                                     | Pneumonia, bronchitis, atelectasis, pulmonary embolism                                                      |
| Barisione et al., 1997 (112)    | Cohort without comparison group | Prospective   | Abdominal                                                                                    | Pneumonia, atelectasis, respiratory failure                                                                 |
| Mitchell et al., 1998 (115)‡    | Cohort without comparison group | Prospective   | Elective nonthoracic                                                                         | Bronchitis, bronchospasm, atelectasis, pneumonia, ARDS, pleural effusion, pneumothorax, respiratory failure |
| Fuso et al., 2000 (140)         | Cohort                          | Retrospective | Elective abdominal                                                                           | Pneumonia, pneumothorax, pleural effusion, respiratory failure                                              |

\* AAA = abdominal aortic aneurysm; ARDS = acute respiratory distress syndrome; COPD = chronic obstructive pulmonary disease; NA = not available; PFT = pulmonary function test; PPC = postoperative pulmonary complication.

† Based on criteria from the U.S. Preventive Services Task Force.

‡ COPD was preoperative sputum production.

**Appendix Table 8—Continued**

| Inclusion Criteria                                                                                                            | Exclusion Criteria                                                                                                                                                     | Included All Patients during Study Period or Only at Discretion of Ordering Physician | Hierarchy of Research Design† | Mean Age, y | Men, % |
|-------------------------------------------------------------------------------------------------------------------------------|------------------------------------------------------------------------------------------------------------------------------------------------------------------------|---------------------------------------------------------------------------------------|-------------------------------|-------------|--------|
| Elective surgery, current or never smokers, negative questionnaire for respiratory symptoms or history of respiratory disease | Productive cough, preoperative diagnosis of asthma, COPD, other chronic respiratory disease, previous smoker, local or nonspinal regional anesthesia, thoracic surgery | All                                                                                   | II-2                          | NA          | 41     |
|                                                                                                                               |                                                                                                                                                                        | All                                                                                   | II-3                          | NA          | NA     |
|                                                                                                                               | Preoperative intravenous nutrition not essential                                                                                                                       | No PFTs                                                                               | II-2                          | 61          | 46     |
|                                                                                                                               |                                                                                                                                                                        | No PFTs                                                                               | II-3/C                        | NA          | NA     |
| Age > 65 y                                                                                                                    |                                                                                                                                                                        | Discretion                                                                            | II-2                          | 73          | 49     |
| Elective                                                                                                                      |                                                                                                                                                                        | All                                                                                   | II-2                          | 65          | 77     |
| Severe COPD with FEV <sub>1</sub> < 50% predicted and FEV <sub>1</sub> :FVC < 70%                                             | Emergency surgery, concomitant nonvascular surgery, retroperitoneal incision                                                                                           | Discretion                                                                            | II-2                          | 66          | 72     |
|                                                                                                                               |                                                                                                                                                                        | Discretion                                                                            | II-3                          | NA          | NA     |
| Midline incision                                                                                                              |                                                                                                                                                                        | All                                                                                   | II-2                          | NA          | 65     |
| COPD, FEV <sub>1</sub> < 1.2 L, FEV <sub>1</sub> :FVC < 75%                                                                   | Preexisting tracheostomy, thoracic surgery                                                                                                                             | All                                                                                   | II-2                          | 68          | 96     |
|                                                                                                                               |                                                                                                                                                                        | All                                                                                   | II-3                          | 48          | 60     |
|                                                                                                                               | None                                                                                                                                                                   | All                                                                                   | II-3                          | 64          | 69     |
|                                                                                                                               | Regional anesthesia                                                                                                                                                    | All                                                                                   | II-2                          | 61.2        | NA     |
| Increased preoperative pulmonary risk                                                                                         | Laparoscopy                                                                                                                                                            | Discretion                                                                            | II-2                          | 63          | 53     |
